# Supplementary material for: Developing Biosensors for SARS-CoV-2 Wastewater-Based Epidemiology: A Systematic Review of Trends, Limitations and Future Perspectives
Source: MDPI journal article supplement (doi:10.3390/su142416761), 2022-12-14
Supplement: s1 [file s1]

# Supplementary Materials

## **Developing biosensors for SARS-CoV-2 wastewater-based epidemiology: a systematic review of trends, limitations and future perspectives**

Christopher C. Azubuike<sup>1</sup>, Fay Couceiro<sup>2\*</sup>, Samuel C. Robson<sup>3,4</sup>, Maya Z. Piccinni<sup>4</sup>, Joy E. M. Watts<sup>4</sup>, John B. Williams<sup>2</sup>, Anastasia J. Callaghan<sup>4\*</sup> and Thomas P. Howard<sup>1\*</sup>

ORCID ID (TPH): 0000-0002-5546-4043

<sup>1</sup>School of Natural and Environmental Sciences, Faculty of Science, Agriculture and Engineering, Newcastle University, Newcastle-upon-Tyne, NE1 7RU, United Kingdom

<sup>2</sup>School of Civil Engineering and Surveying, Faculty of Technology, University of Portsmouth, Portsmouth PO1 3AH, UK

<sup>3</sup>School of Pharmacy and Biomedical Sciences, Institute of Biological and Biomedical Sciences, University of Portsmouth, PO1 2DT, Portsmouth UK

<sup>4</sup>School of Biological Sciences, Institute of Biological and Biomedical Sciences, University of Portsmouth, PO1 2DY, Portsmouth UK

\*Co-corresponding authors

Email address: anastasia.callaghan@port.ac.uk (A.J.C) or Thomas.Howard@newcastle.ac.uk (T.P.H)

## SARS-CoV-2 analysis from wastewater.

| Sample region    | Sampling technique and sample storage                                                                                                   | Sample(s) origin                                            | Concentration technique                                                                  | Extraction method                                                                   | Detection technique          | Target gene                                                               | Positive control(s) - Reference virus (surrogate)                                                 | Ref   |
|------------------|-----------------------------------------------------------------------------------------------------------------------------------------|-------------------------------------------------------------|------------------------------------------------------------------------------------------|-------------------------------------------------------------------------------------|------------------------------|---------------------------------------------------------------------------|---------------------------------------------------------------------------------------------------|-------|
| Germany          | <u>Sampling:</u><br>composite, 24h, flow-dependent<br><u>Transport:</u><br>on ice<br><u>Storage:</u><br>immediate analysis              | Raw WwTW influent after sand trap<br>Various WwTW effluents | centrifugal UF                                                                           | NucleoSpin RNA Virus kit (Macherey Nagel)                                           | Sanger sequencing<br>RT-qPCR | <i>RdRp</i> <sup>b</sup><br><i>E</i><br><i>M</i> <sup>c</sup><br><i>N</i> | endogenous and exogenous bioindicators                                                            | [33]  |
| Canada           | <u>Sampling:</u><br>refrigerated composite, 24h, 1 hour intervals<br><u>Transport:</u><br>on ice<br><u>Storage:</u><br>refrigerated     | Raw WRRF influent after grit removal<br>PCS from WRRF       | PEG precipitation                                                                        | RNeasy PowerMicrobiome Kit (Qiagen)                                                 | RT-qPCR<br>RT-ddPCR          | <i>E</i><br>N1<br>N2<br>N3                                                | human microbiome-specific HF183<br>Bacteroides 16S ribosomal rRNA<br>eukaryotic 18S rRNA<br>PMMoV | [37]  |
| Sweden and Italy | <u>Sampling:</u><br>NI<br><u>Transport:</u><br>NI<br><u>Storage:</u><br>Refrigerated frozen                                             | *Untreated municipal wastewaters                            | UF double-UF <sup>a</sup><br>adsorption-extraction, centrifugation-adsorption-extraction | RNeasy PowerMicrobiome Kit (Qiagen)<br>Trizol<br>LS/chloroform                      | RT-qPCR                      | N                                                                         | BCoV<br>PMMoV                                                                                     | [39]  |
| Japan            | <u>Sampling:</u><br>grab composite, generated from defined daily frozen samples<br><u>Transport:</u><br>NI<br><u>Storage:</u><br>frozen | *Raw WwTW influent                                          | UF<br>EMV<br>PEG precipitation after pre-centrifugation <sup>a</sup>                     | QIAamp Viral RNA Mini Kit (Qiagen)<br>TRIzol LS/RNeasy PowerMicrobiome Kit (Qiagen) | RT-qPCR                      | <i>N1</i><br><i>N2</i><br><i>N3</i>                                       | <i>Pseudomonas</i> phage<br>phi6<br>MS2 phage                                                     | [123] |

|           |                                                                                                                                                                                                   |                                                                                                               |                                                                                                                         |                                                                                          |                                                                                  |                        |                                               |       |
|-----------|---------------------------------------------------------------------------------------------------------------------------------------------------------------------------------------------------|---------------------------------------------------------------------------------------------------------------|-------------------------------------------------------------------------------------------------------------------------|------------------------------------------------------------------------------------------|----------------------------------------------------------------------------------|------------------------|-----------------------------------------------|-------|
| Australia | <u>Sampling:</u><br>composite collected<br>refrigerated<br>composite from a<br>submersible in-situ<br>high frequency<br>autosampler<br><u>Transport:</u><br>NI<br><u>Storage:</u><br>refrigerated | Untreated influent<br>WwTW<br>Pumping station<br>(PS).                                                        | UF<br>electronegative<br>vortex                                                                                         | QIAamp Viral RNA<br>Mini Kit (Qiagen)<br>AGPC/ TRIzol<br>(Thermo Fisher<br>Scientific)   | Sanger<br>sequencing<br>Amplicon<br>sequencing<br>(Illumina<br>MiSeq)<br>RT-qPCR | N                      | <i>Oncorhynchus keta</i> (O.<br><i>keta</i> ) | [15]  |
| Japan     | <u>Sampling:</u><br>grab<br><u>Transport:</u><br>on ice<br><u>Storage:</u><br>immediate analysis                                                                                                  | Raw WwTW<br>influent<br>Secondary<br>treated water<br>from WwTW<br>(before<br>chlorination)<br>River samples  | EMV <sup>a</sup><br>membrane<br>adsorption direct<br>RNA                                                                | QIAamp Viral RNA<br>Mini Kit (Qiagen)                                                    | RT-qPCR<br>Nested PCR                                                            | S<br>N1<br>N2<br>ORF1a | PMMoV<br>MS2 phage                            | [124] |
| Italy     | <u>Sampling:</u><br>grab, 1pm<br><u>Transport:</u><br>refrigerated<br><u>Storage:</u><br>immediate analysis                                                                                       | Raw WwTW<br>influent<br>WwTW effluent<br>after tertiary<br>disinfection<br>River samples                      | UF                                                                                                                      | QIAMP VIRAL<br>RNA mini kit<br>(Qiagen)<br>RNeasy<br>PowerWater Kit<br>(Qiagen)          | RT-qPCR<br>Whole<br>genome<br>sequencing                                         | N<br>ORF1ab<br>E       | SARS-like coronavirus                         | [67]  |
| USA       | <u>Sampling:</u><br>composite 24h<br>grab, between 7-<br>11am<br><u>Transport:</u><br>on ice<br><u>Storage:</u><br>immediate analysis<br>frozen                                                   | Untreated WwTW<br>influent<br>Secondary<br>treated water<br>from WwTW<br>Final effluent after<br>disinfection | UF<br>adsorption–elution<br>method using an<br>electronegative<br>membrane                                              | ZR Viral RNA Kit<br>(ZymoResearch)                                                       | RT-qPCR                                                                          | N1<br>N2               | <i>Pseudomonas</i> phage<br>phi6              | [125] |
| USA       | <u>Sampling:</u><br>grab<br><u>Transport:</u><br>NI<br><u>Storage:</u><br>refrigerated                                                                                                            | Primary WwTW<br>samples<br>Primary sludge<br>samples                                                          | UF<br>bag-mediated<br>filtration<br>skimmed milk<br>flocculation <sup>a</sup><br>PEG precipitation<br>sludge extraction | QIAamp Viral<br>RNAMini Kit<br>(Qiagen)<br>RNeasy PowerSoil<br>Total RNA kit<br>(Qiagen) | RT-qPCR                                                                          | N1<br>N2<br>N3         | HCoV OC43                                     | [126] |

|           |                                                                                                                                             |                                                                                                                             |                                                                                                                                                                             |                                                                                 |                                                                    |                                                             |                                                                                                                                |       |
|-----------|---------------------------------------------------------------------------------------------------------------------------------------------|-----------------------------------------------------------------------------------------------------------------------------|-----------------------------------------------------------------------------------------------------------------------------------------------------------------------------|---------------------------------------------------------------------------------|--------------------------------------------------------------------|-------------------------------------------------------------|--------------------------------------------------------------------------------------------------------------------------------|-------|
| India     | <u>Sampling:</u><br>grab, 11.30am<br><u>Transport:</u><br>on ice<br><u>Storage:</u><br>refrigerated                                         | Raw WwTW<br>influent<br>WwTW effluent<br>(no disinfection)                                                                  | centrifugation<br>filtration/PEG<br>precipitation                                                                                                                           | NucleoSpin® RNA<br>Virus (Macherey-<br>Nagel)                                   | RT-qPCR                                                            | <i>S</i><br><i>N</i><br><i>ORF1ab</i>                       | MS2 phage                                                                                                                      | [127] |
| Argentina | <u>Sampling:</u><br>grab<br><u>Transport:</u><br>NI<br><u>Storage:</u><br>refrigerated                                                      | Raw WwTW<br>influent                                                                                                        | UF<br>adsorption-elution-<br>PEG precipitation<br>PEG precipitation <sup>a</sup><br>PAC flocculation <sup>a</sup><br>skim milk<br>flocculation,<br>adsorption-elution<br>UF | proteinase K<br>treatment /<br>Maxwell®RSC 48<br>Extraction System<br>(Promega) | RT-qPCR                                                            | <i>N1</i><br><i>N2</i>                                      | RNase P                                                                                                                        | [128] |
| USA       | <u>Sampling:</u><br>grab, 10-11am<br>refrigerated<br>composite, 24h, flow-<br>dependent<br><u>Transport:</u><br>NI<br><u>Storage:</u><br>NI | WwTW influent<br>WwTW primary<br>effluent<br>River samples<br>Untreated lake<br>surface water<br>Finished drinking<br>water | hollow fiber UF<br>centrifugal filtration<br>PEG precipitation                                                                                                              | Purelink Viral<br>RNA/DNA Mini Kit<br>(Thermo Fisher<br>Scientific)             | RT-qPCR                                                            | <i>E</i><br><i>N1</i><br><i>N2</i><br><i>ORF1a</i>          | BCoV<br>PMMoV                                                                                                                  | [129] |
| Spain     | <u>Sampling:</u><br>composite, 24h<br><u>Transport:</u><br>refrigerated<br><u>Storage:</u><br>refrigerated<br>frozen                        | Raw WwTW<br>influent                                                                                                        | centrifugal UF <sup>a</sup><br>automated<br>concentrating<br>pipette                                                                                                        | QIAamp Viral RNA<br>Mini kit (Qiagen)                                           | qPCR<br>RT-qPCR                                                    | <i>N1</i>                                                   | NI                                                                                                                             | [130] |
| Brazil    | <u>Sampling:</u><br>composite, 24h, 25<br>mins<br><u>Transport:</u><br>NI<br><u>Storage:</u><br>frozen                                      | Raw sewage from<br>network                                                                                                  | glycine/PEG<br>precipitation                                                                                                                                                | QIAamp Viral RNA<br>Mini kit (Qiagen)                                           | RT-qPCR<br>Amplicon<br>sequencing<br>(Illumina<br>DNA Prep<br>kit) | <i>RT-<br/>qPCR</i><br><i>N1</i><br><i>S</i><br><i>RdRp</i> | 2019-nCoV_N_Positive<br>Control plasmid DNA<br>(IDT)                                                                           | [32]  |
| Brazil    | <u>Sampling:</u><br>composite, 10h<br><u>Transport:</u><br>refrigerated<br><u>Storage:</u><br>refrigerated                                  | Raw sewage from<br>network<br>Raw WwTW<br>influent                                                                          | ultra centrifugation/<br>glycine                                                                                                                                            | QIAamp® Viral<br>RNA Mini kit<br>(Qiagen)                                       | RT-qPCR<br>Whole<br>genome<br>sequencing<br>(Illumina<br>MiSeq)    | <i>N</i>                                                    | BRSV/Inforce™ 3<br>(Zoetis, US)<br>bacteriophage (PP7,<br>ATCC 15692-B2)<br>2019-nCoV RUO Kit (Integrated DNA<br>Technologies) | [46]  |

|                                |                                                                                                                                      |                                                                                               |                                                                                          |                                                                                   |                                                                                        |          |                                                                                |       |
|--------------------------------|--------------------------------------------------------------------------------------------------------------------------------------|-----------------------------------------------------------------------------------------------|------------------------------------------------------------------------------------------|-----------------------------------------------------------------------------------|----------------------------------------------------------------------------------------|----------|--------------------------------------------------------------------------------|-------|
| USA                            | <u>Sampling:</u><br>refrigerated<br>composite, 24h, flow-<br>dependent<br><u>Transport:</u><br>NI<br><u>Storage:</u><br>refrigerated | Raw WRRF<br>influent after<br>stone trap                                                      | filtration                                                                               | RNeasy Mini Kit<br>(Qiagen)                                                       | RT-qPCR<br>Sanger<br>sequencing<br>Whole<br>genome<br>sequencing<br>(MinION/AR<br>TIC) | N1<br>N2 | control plasmid<br>(IDT#10006625) (PTC)                                        | [45]  |
| USA                            | <u>Sampling:</u><br>composite 24h, 15<br>mins<br><u>Transport:</u><br>NI<br><u>Storage:</u><br>immediate analysis                    | Raw sewage from<br>network                                                                    | UF (viral particles)<br>silica columns or<br>silica milk (total<br>RNA)<br>oligo-capture | AllPrep DNA/RNA<br>mini kit (Qiagen)                                              | RT-qPCR<br>Whole<br>genome<br>sequencing<br>(Illumina<br>NextSeq<br>550)               | N1       | synthetic RNA<br>standards of the SARS-<br>CoV-2 genome (Twist<br>Biosciences) | [131] |
| Cruise<br>ship and<br>Aircraft | <u>Sampling:</u><br>grab, on arrival<br><u>Transport:</u><br>on ice<br><u>Storage:</u><br>refrigerated                               | Influent and<br>effluent of cruise<br>ship membrane<br>bioreactor<br>Aircraft sewage<br>tanks | UF<br>adsorption–<br>extraction with<br>electronegative<br>membrane                      | RNeasy<br>PowerWater Kit<br>(Qiagen)<br>RNeasy<br>PowerMicrobiome<br>Kit (Qiagen) | RT-qPCR<br>RT-ddPCR<br>Amplicon<br>sequencing<br>(Illumina<br>NextSeq)                 | N<br>E   | NI                                                                             | [132] |

Abbreviations: PEG, polyethylene glycol; PAC, Aluminum polychloride; RT-qPCR, reverse transcription-quantitative polymerase chain reaction; RT-ddPCR, reserve transcription-digital droplet polymerase chain reaction; *RdRp*, RNA dependent RNA polymerase gene; *E*, envelope gene; *M*, membrane gene; *N*, nucleocapsid gene; ORF, open reading frame; BCoV, Bovine coronavirus; HCoV, Human coronavirus; PPMoV, Pepper mild mottle virus; MHV, Murine hepatitis virus-A59; ref, reference. WwTW - wastewater treatment works, WRRF - water resource recovery facility, NI no information given,

Superscript: a, viral concentration technique identified as most suitable; b, viral most specific target; c, viral most sensitive target.

\* limited information regarding sampling locations and methods.

## References

- [15] W. Ahmed, N. Angel, J. Edson, K. Bibby, A. Bivins, J.W. O'Brien, P.M. Choi, M. Kitajima, S.L. Simpson, J. Li, B. Tscharke, R. Verhagen, W.J.M. Smith, J. Zaugg, L. Dierens, P. Hugenholtz, K. V. Thomas, J.F. Mueller, First confirmed detection of SARS-CoV-2 in untreated wastewater in Australia: A proof of concept for the wastewater surveillance of COVID-19 in the community, *Sci. Total Environ.* 728 (2020). <https://doi.org/10.1016/j.scitotenv.2020.138764>.
- [32] G. Fongaro, P.H. Stoco, D.S.M. Souza, E.C. Grisard, M.E. Magri, P. Rogovski, M.A. Schörner, F.H. Barazzetti, A.P. Christoff, L.F.V. de Oliveira, M.L. Bazzo, G. Wagner, M. Hernández, D. Rodríguez-Lázaro, The presence of SARS-CoV-2 RNA in human sewage in Santa Catarina, Brazil, November 2019, *Sci. Total Environ.* 778 (2021) 1–4. <https://doi.org/10.1016/j.scitotenv.2021.146198>.
- [33] S. Westhaus, F.A. Weber, S. Schiwy, V. Linnemann, M. Brinkmann, M. Widera, C. Greve, A. Janke, H. Hollert, T. Wintgens, S. Ciesek, Detection of SARS-CoV-2 in raw and treated wastewater in Germany – Suitability for COVID-19 surveillance and potential transmission risks, *Sci. Total Environ.* 751 (2021) 1–12. <https://doi.org/10.1016/j.scitotenv.2020.141750>.
- [37] P.M. D'Aoust, É. Mercier, D. Montpetit, J.J. Jia, I. Alexandrov, N. Neault, A.T. Baig, J. Mayne, X. Zhang, T. Alain, M.R. Servos, M. MacKenzie, D. Figeys, A.E. MacKenzie, T.E. Graber, R. Delatolla, Quantitative analysis of SARS-CoV-2 RNA from wastewater solids in communities with low COVID-19 incidence and prevalence, *Water Res.* 188 (2020). <https://doi.org/10.1101/2020.08.11.20173062>.
- [39] M.H. Jafferli, K. Khatami, M. Atasoy, M. Birgersson, C. Williams, Z. Cetecioglu, Benchmarking virus concentration methods for quantification of SARS-CoV-2 in raw wastewater, *Sci. Total Environ.* 755 (2021). <https://doi.org/10.1016/j.scitotenv.2020.142939>.
- [45] A. Nemudryi, A. Nemudraia, T. Wiegand, K. Surya, M. Buyukyoruk, C. Cicha, K.K. Vanderwood, R. Wilkinson, B. Wiedenheft, Temporal Detection and Phylogenetic Assessment of SARS-CoV-2 in Municipal Wastewater, *Cell Reports Med.* 1 (2020). <https://doi.org/10.1016/j.xcrm.2020.100098>.
- [46] Prado, T.; Fumian, T.M.; Mannarino, C.F.; Resende, P.C.; Motta, F.C.; Eppinghaus, A.L.F.; Vale, V.H.C.d.; Braz, R.M.S.; de Andrade, J.d.R.; Maranhão, A.G.; et al. Wastewater-based epidemiology as a useful tool to track SARS-CoV-2 and support public health policies at municipal level in Brazil. *Water Res.* 2021, 191, 116810. <https://doi.org/10.1016/j.watres.2021.116810>.
- [67] S.G. Rimoldi, F. Stefani, A. Gigantiello, S. Polesello, F. Comandatore, D. Mileto, M. Maresca, C. Longobardi, A. Mancon, F. Romeri, C. Pagani, L. Moja, M.R. Gismondo, F. Salerno, Presence and vitality of SARS-CoV-2 virus in wastewaters and rivers, *Sci. Total Environ.* 744 (2020). <https://doi.org/10.1101/2020.05.01.20086009>.
- [123] S. Torii, H. Furumai, H. Katayama, Applicability of polyethylene glycol precipitation followed by acid guanidinium thiocyanate-phenol-chloroform extraction for the detection of SARS-CoV-2 RNA from municipal wastewater, *Sci. Total Environ.* 756 (2021) 143067. <https://doi.org/10.1016/j.scitotenv.2020.143067>.
- [124] E. Haramoto, B. Malla, O. Thakali, M. Kitajima, First environmental surveillance for the presence of SARS-CoV-2 RNA in Wastewater and river water in Japan, *Sci. Total Environ.* 737 (2020). <https://doi.org/10.1101/2020.06.04.20122747>.
- [125] S.P. Sherchan, S. Shahin, L.M. Ward, S. Tandukar, T.G. Aw, B. Schmitz, W. Ahmed, M. Kitajima, First detection of SARS-CoV-2 RNA in wastewater in North America: A study in Louisiana, USA, *Sci. Total Environ.* 743 (2020) 1–6. <https://doi.org/10.1016/j.scitotenv.2020.140621>.
- [126] S.E. Philo, E.K. Keim, R. Swanstrom, A.Q.W. Ong, E.A. Burnor, A.L. Kossik, J.C. Harrison, B.A. Demeke, N.A. Zhou, N.K. Beck, J.H. Shirai, J.S. Meschke, A comparison of SARS-CoV-2 wastewater concentration methods for environmental surveillance, *Sci. Total Environ.* 760 (2021). <https://doi.org/10.1016/j.scitotenv.2020.144215>.
- [127] M. Kumar, A.K. Patel, A. V. Shah, J. Raval, N. Rajpara, M. Joshi, C.G. Joshi, The first proof of the capability of wastewater surveillance for COVID-19 in India through the detection of the genetic material of SARS-CoV-2, *Sci. Total Environ.* 746 (2020). <https://doi.org/10.1101/2020.06.16.20133215>.
- [128] P.A. Barril, L.A. Pianciola, M. Mazzeo, M.J. Ousset, M.V. Jaureguiberry, M. Alessandrello, G. Sánchez, J.M. Oteiza, Evaluation of viral concentration methods for SARS-CoV-2 recovery from wastewaters, *Sci. Total Environ.* 756 (2021). <https://doi.org/10.1016/j.scitotenv.2020.144105>.
- [129] D. Gerrity, K. Papp, M. Stoker, A. Sims, W. Frehner, Early-pandemic wastewater surveillance of SARS-CoV-2 in Southern Nevada: Methodology, occurrence, and incidence/prevalence considerations, *Water Res.* X. 10 (2021). <https://doi.org/10.1016/j.wroa.2020.100086>.
- [130] E. Forés, S. Bofill-Mas, M. Itarte, S. Martínez-Puchol, A. Hundesa, M. Calvo, C.M. Borrego, L.L. Corominas, R. Girones, M. Rusiñol, Evaluation of two rapid ultrafiltration-based methods for SARS-CoV-2 concentration from wastewater, *Sci. Total Environ.* 768 (2021). <https://doi.org/10.1016/j.scitotenv.2020.144786>.
- [131] A. Crits-Christoph, R.S. Kantor, M.R. Olm, O.N. Whitney, B. Al-Shayeb, Y.C. Lou, A. Flamholz, L.C. Kennedy, H. Greenwald, A. Hinkle, J. Hetzel, S. Spitzer, J. Koble, A. Tan, F. Hyde, G. Schroth, S. Kuersten, J.F. Banfield, K.L. Nelson, Genome sequencing of sewage detects regionally prevalent SARS-CoV-2 variants, *MBio.* 12 (2021) 1–9. <https://doi.org/10.1128/mBio.02703-20>.
- [132] W. Ahmed, P.M. Bertsch, N. Angel, K. Bibby, A. Bivins, L. Dierens, J. Edson, J. Ehret, P. Gyawali, K.A. Hamilton, I. Hosegood, P. Hugenholtz, G. Jiang, M. Kitajima, H.T. Sichani, J. Shi, K.M. Shimko, S.L. Simpson, W.J.M. Smith, E.M. Symonds, K. V. Thomas, R. Verhagen, J. Zaugg, J.F. Mueller, Detection of SARS-CoV-2 RNA in commercial passenger aircraft and cruise ship wastewater: A surveillance tool for assessing the presence of COVID-19 infected travellers, *J. Travel Med.* 27 (2021) 1–11. <https://doi.org/10.1093/JTMTAAA116>.
